# Supplementary material for: Measuring Economic, Social and Environmental Wellbeing of Asian Economies
Source: Research Square preprint supplement (doi:10.21203/rs.3.rs-488388/v1), 2021-05-28
Supplement: Supplementary file 1 [file cae910727bbac153334315a1.docx]

**Appendix**

Appendix I (Country by GDP per capita)

Source: World Bank 2019

Appendix II (Country List)

| Afghanistan | Armenia | Azerbaijan | Bahrain | Bangladesh | Bhutan | Brunei | Cambodia |
| --- | --- | --- | --- | --- | --- | --- | --- |
| China | Georgia | Hong Kong | India | Indonesia | Iran | Iraq | Israel |
| Japan | Jordan | Kazakhstan | North Korea | South Korea | Kuwait | Kyrgyz Republic | Lao PDR |
| Lebanon | Malaysia | Mongolia | Myanmar | Nepal | Oman | Pakistan | Papua New Guinea |
| Philippines | Qatar | Russia | Saudi Arabia | Singapore | Sri Lanka | Syria | Tajikistan |
| Thailand | Turkey | Turkmenistan | UAE | Uzbekistan | Vietnam | Yemen |  |

Source: Authors compilation
